# Supplementary material
Source: PubMed Central journal article supplement (PMC1413717)

$R_0 = 2.2$ 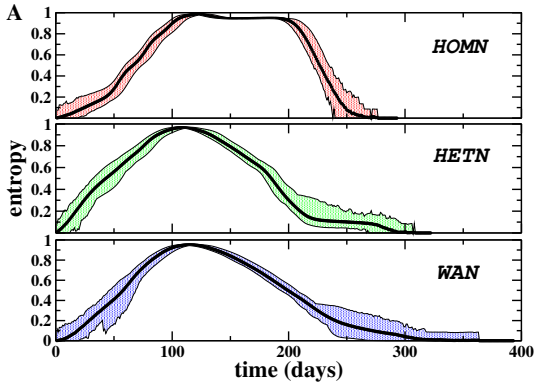 $R_0 = 3.7$ 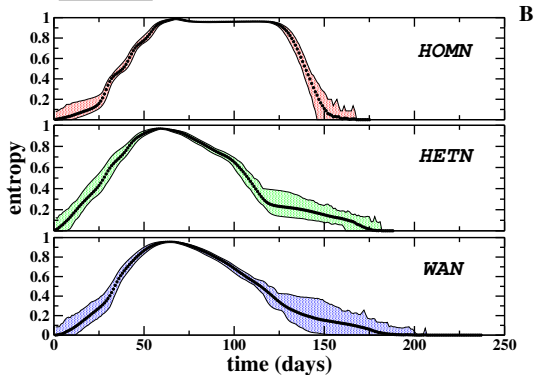

Supplement: pnas_0510525103_1.pdf [file pnas_0510525103_1.pdf]

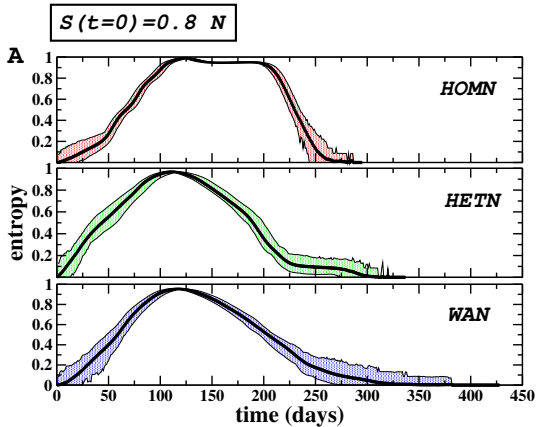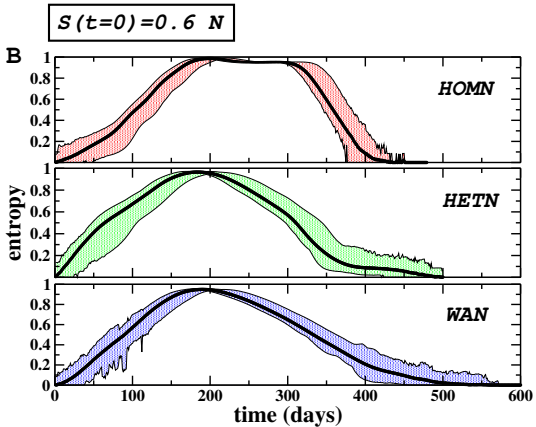

Supplement: pnas_0510525103_2.pdf [file pnas_0510525103_2.pdf]
